# Supplementary material for: Genome-wide expression profiling of microRNAs in poplar upon infection with the foliar rust fungus Melampsora larici-populina
Source: PubMed Central journal article supplement (PMC4570220; doi:10.1186/s12864-015-1891-8), 2015-09-15

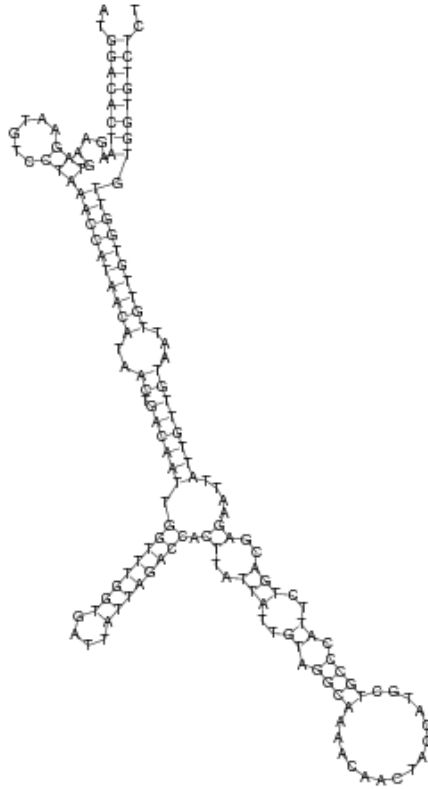

**Novel\_mir\_166** (CK-m0210-5p 20)

TGTTTTTAAGTTCAGAGCAGTCAGACACATCAAGTCTTTTGAGGGATTTCAAACCACGTATGC  
 TACTGGGAATACTTTCAAGGTTCTTACAATTGTTTCATGCTCAATAGAACTAAACCAGCCAAAC  
 AATGAAATGATGAGGATAGTTCTGCAATAGCAGTCCCATCTAAACGAAGCTCCCTCAAGCAAT  
 TCATGTTTCCTACTATATCAGGAACTTATCAAGTTTGTAGCAGCTACTGAAAGTGCAAAC  
 .(((.(.(((((((.((((.(.....((((((((((((.....((...((((((.....))))))))))....)))).)).....(((.((..  
 ...((((.....)))))))).....)))))).....)))).....(((

\*\*\*\*\*TTCAGAGCAGTCAGACACATC\*\*\*\*\*  
 \*\*\*\*\*  
 \*\*\*\*\*  
 \*







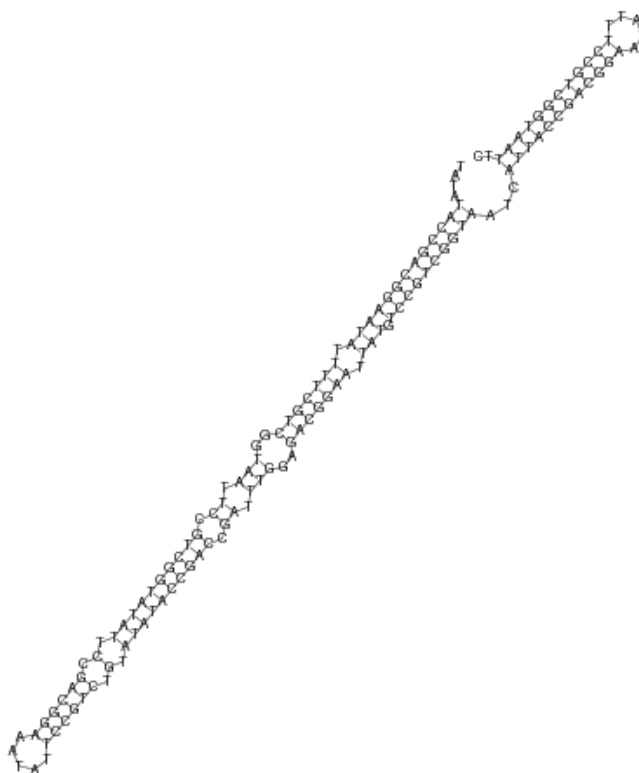

**Novel\_mir\_211**

(CK-m0274-3p 27, Sb052-m0264-3p, 16 Th053-m0273-3p 14)

TTTGGTAGCATCAAGTTCATCATCCAATTTGGAATTTTATGGGGGAAGTGGCAGCTTCCTCA  
 ACTTCTTCAGATTTGAATGAGGTTGAAGCCTATCAA CK-m0274 27

.(((((((.(((.((((.(((((((((.....((((((((.....)))))))))).)))).)))))).))))))

\*\*\*\*\*TTCAGATTTGAAT  
 GAGGTTGA\*\*\*\*\*

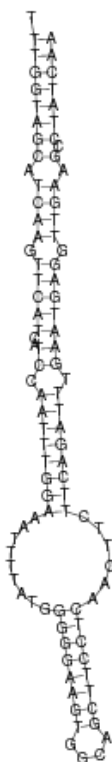

(CK\_m0275\_3p 27, Th053-m0274-3p 14)

ATGGTGGAAGTTGTTACAGTTGTAACAGTCTCTTAGCTTCAACTCCAAGATTGTTAGCAT  
CAAGTTCATCATCCAATTTGAAAATCTTGAACCTCCATATTCATCTATTCTCAACGTCTTCA  
TTGAATGAGGTTGAAGCCTATCAA

.((((((((((((((.....((((.....)))))))).)))))))))....(((((((.....((((.....)))))))).)))))))))

\*\*\*\*\*  
\*\*\*\*\*TTCAGATTTGAATGAGGTTGA\*\*\*\*\*

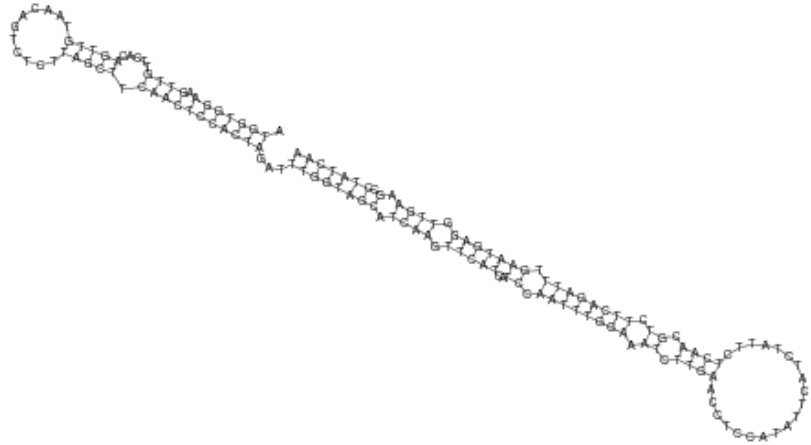

**Novel\_mir\_222** (CK-m0292-5p 11, Sb052-m0277-5p 20)

AGACTTTCACTTGAGGGTGTGTGTTAGAGAATAAATAAAATCATATATCGAAACCTCACCTA  
ACAGTTTAAAGCTTTTAGGTAAATTTGGTCTTTTGACAAAGTAAACATATTCATCCAAAGCATC  
ATACAGAACATAACAACCATCACAGTATTCAATCACCTAAGTTATTGCTCTCTTTGTTATGCTGT  
CATTTTCTTCTATAATTTATTAACCTAAATATTAAAGGATCTTTATTTTATAGAGAACTTATTTT  
GCAATGAACATAAAGGTCTAATTCAAATTTCTTACAACCTTCACCGTACAAGTATCGTT  
TA

(((((.....((((((((((.....)))))))).)))))).....((((((((.....))))))....((((((((.....))))))....

\*\*\*\*\*TTGAGGGTGTGTGTTAGAGAA\*\*\*\*\*  
\*\*\*\*\*  
\*\*\*\*\*  
\*\*\*\*\*









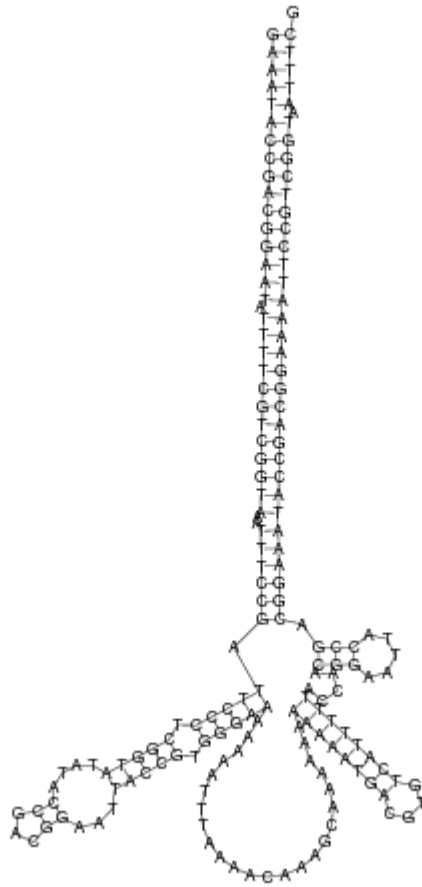

**Novel\_mir\_250** (Sb052-m0015-3p 18, Th053-m0022-3p 21)

ATTTTTTCCAGTATGTCAAGTGCATCATCATGATGCCATAGTCTTGTACGTTTCCAAGGTCA  
TCGGGTGATTCTTGACGGACAATTTCTCTCC

.....((.((((((...(((((((((.....)))))))).)))))).....

\*\*\*\*\*TCGGGTGATTCTTGAC  
GGACA\*\*\*\*\*



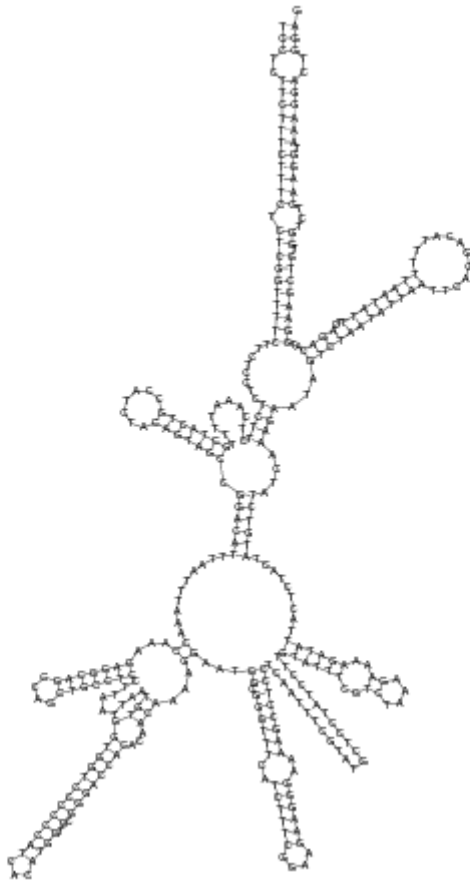

**Novel\_mir\_290** (Sb052-m0125-5p 21)

AAGACGGCGAGATGATTTGGAAGCCGGAGAAAGTCGTTCTACTGGCTTTGATCGCCTCCATCG  
GCCGCCTC

.(.(((((((.((((..(((((((((((.....))))))))).....)))))).....))))).

\*\*\*\*\*GATGATTTGGAAGCCGGAGAA\*\*\*\*\*













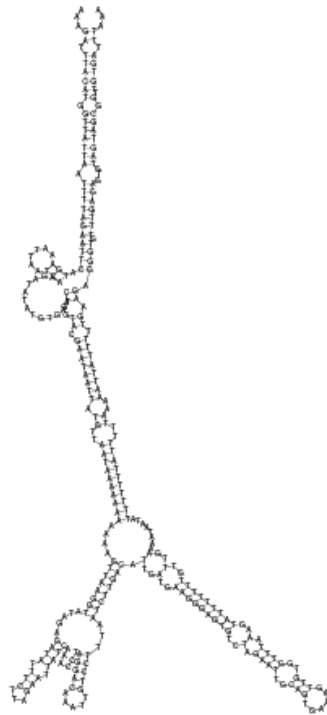

**Novel\_mir\_93**

(CK-m0111-3p 82)

ATTTGGGTCTGATTGAAGGATTTAATTAGGTGCAAGGACTTAATTATACTTTAAACATGTCTA  
 ATTAATTTTCTTAGGGGTTTAATTGGTGAAACTTAAGTTTGGGAGCCATTTGGACTTAATT  
 GAGAAGATTAGAATTTTAG

..(((((((((.....)))))))).))))).(((((((((((((.....)))))))).))))).(((((((((((((.....)))))))).))))).(((((((((((((.....)))))))).))))).(((((((((((((.....)))))))).))))).(((((((((((((.....)))))))).))))).(((((((((((((.....)))))))).))))).(((((((((((((.....)))))))).))))).(((((((((((((.....)))))))).))))).(((((((((((((.....)))))))).))))).(((((((((((((.....)))))))).))))).(((((((((((((.....)))))))).))))).(((((((((((((.....)))))))).))))..)

.....

\*\*\*\*\*  
 \*\*\*\*\*TTTGGACTTAATTGAGAAGATT\*\*\*\*\*

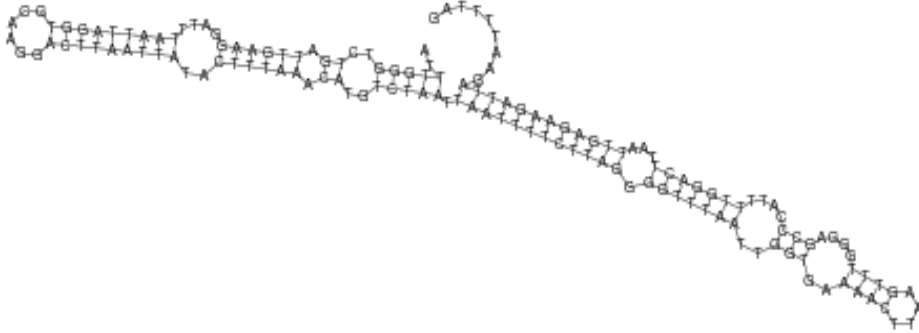

(CK-m0314-3p 151 Th053-m0307-3p 105)

TTAATAAGCCAATTTGATTTAATTATGGGCCAAATTAAGATTAATTATGTTTAAAAATTAATT  
TGGATTCAATTAAGGATTTAATTAGGTGTAAAGACTACATTATACTTTAAATGGGTCAAATT  
AATTTTATTAGGACTTAATTGGTGATTAAATGGGTCAAATTAATTTTATTAGGACTTAATTGGT  
GAAAATTAAGTTTAGGAGCTCACTTTGGACTTAATTGAGAAGATTGGAATTTTAG  
.(((.....(((((((.....(((.....(((.....((.....(.....))))))).....))))).....)).....)).....  
(((((((.....)))))).....)))).....)))).....)))).....)))).....)))).....)))).....)))).....))  
\*\*\*\*\*  
\*\*\*\*\*  
\*\*\*\*\*TTTGGACTTAATTGAGAAGATT\*\*\*\*\*

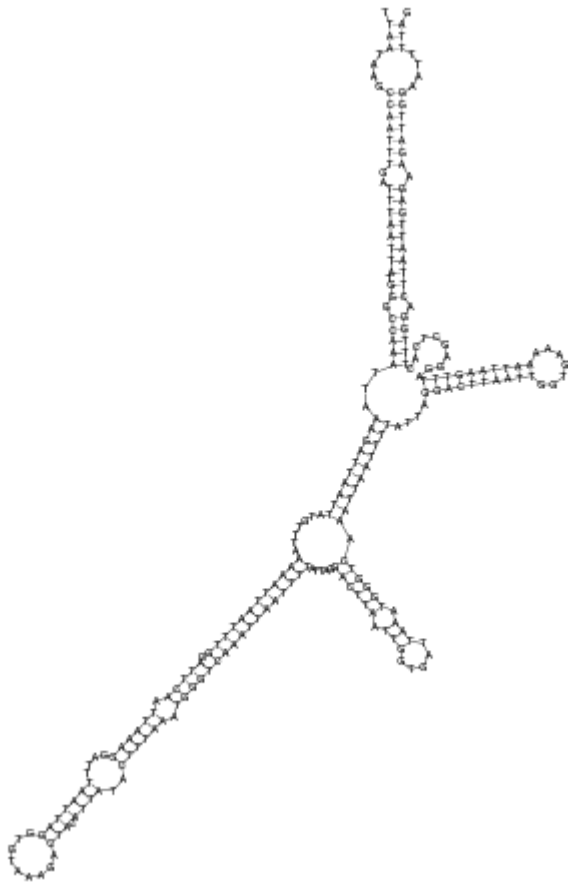

Supplement: 12864_2015_1891_MOESM3_ESM.pdf [file 12864_2015_1891_MOESM3_ESM.pdf]
